# Supplementary material for: Non-targeted Metabolomics in Diverse Sorghum Breeding Lines Indicates Primary and Secondary Metabolite Profiles Are Associated with Plant Biomass Accumulation and Photosynthesis
Source: Front Plant Sci. 2016 Jul 11;7:953. doi: 10.3389/fpls.2016.00953 (PMC4939745; doi:10.3389/fpls.2016.00953)
Supplement: Supplementary Table 3 — Spearman's r- and p-values for metabolite-trait correlations. [file Table3.xlsx]

## Sheet: Supplementary Table 2
Supplementary Table 3. Spearman’s r values and p-values for metabolite-trait correlations
Metabolite	Platforma	Sumner scoreb	Average leaf area			Stem diameter (mm)			Internal to ambient CO2			Stomatal conductance			Photosynthesis			Chlorophyll A:total			Chlorophyll B:total			Leaf harvest index			Lignin%			Leaf weight (g)			Total dry weight (g)			Stem harvest index			Xyl.(g/plant)			Lig.(g/plant)			Stem weight (g)			Xylan%
			Spearmans r	Spearmans r2	p-value	Spearmans r	Spearmans r2	p-value	Spearmans r	Spearmans r2	p-value	Spearmans r	Spearmans r2	p-value	Spearmans r	Spearmans r2	p-value	Spearmans r	Spearmans r2	p-value	Spearmans r	Spearmans r2	p-value	Spearmans r	Spearmans r2	p-value	Spearmans r	Spearmans r2	p-value	Spearmans r	Spearmans r2	p-value	Spearmans r	Spearmans r2	p-value	Spearmans r	Spearmans r2	p-value	Spearmans r	Spearmans r2	p-value	Spearmans r	Spearmans r2	p-value	Spearmans r	Spearmans r2	p-value	Spearmans r	Spearmans r2
Flavonoid glycoside 3	LC-MS	3	0.5455	0.2975	0.0827	0.0683	0.0047	0.8418	0.8182	0.6694	0.0021	0.3091	0.0955	0.355	0.1909	0.0364	0.5739	0.4	0.16	0.2229	0.4273	0.1826	0.1899	0.0511	0.0026	0.8815	0.041	0.0017	0.9047	0.1868	0.0349	0.5824	0.0636	0.004	0.8525	0.3744	0.1402	0.2566	0.4091	0.1674	0.2115	0.1636	0.0268	0.6307	0.287	0.0824	0.3921	0.4727	0.2235
Flavonoid diglycoside	LC-MS	3	0.5091	0.2592	0.1097	0.082	0.0067	0.8106	0.8273	0.6844	0.0017	0.3182	0.1012	0.3403	0.2	0.04	0.5554	0.3455	0.1193	0.2981	0.3727	0.1389	0.2589	0.0928	0.0086	0.786	0.041	0.0017	0.9047	0.2506	0.0628	0.4574	0.0909	0.0083	0.7904	0.4064	0.1652	0.2149	0.4545	0.2066	0.1601	0.1909	0.0364	0.5739	0.3098	0.096	0.3539	0.5273	0.278
Flavonoid glycoside 5	LC-MS	3	0.6091	0.371	0.0467	0.1595	0.0254	0.6396	0.8364	0.6995	0.0013	0.2545	0.0648	0.45	0.1545	0.0239	0.65	0.3545	0.1257	0.2847	0.3727	0.1389	0.2589	0.1439	0.0207	0.673	0.1458	0.0213	0.6689	0.246	0.0605	0.4659	0.0909	0.0083	0.7904	0.3881	0.1506	0.2382	0.4182	0.1749	0.2006	0.2091	0.0437	0.5372	0.2916	0.085	0.3843	0.4545	0.2066
Aconitic acid	GC-MS	2	0.6091	0.371	0.0467	0.2187	0.0478	0.5183	0.4727	0.2235	0.142	0.2636	0.0695	0.4334	0.1	0.01	0.7699	0.1727	0.0298	0.6115	0.1636	0.0268	0.6307	-0.065	0.0042	0.8495	-0.0228	0.0005	0.947	0.5103	0.2604	0.1088	0.5364	0.2877	0.089	0.3973	0.1578	0.2263	0.6636	0.4404	0.026	0.5727	0.328	0.0655	0.5421	0.2939	0.0849	0.4545	0.2066
Glucofrangulin	LC-MS	3	0.7909	0.6255	0.0037	0.369	0.1362	0.2641	0.4091	0.1674	0.2115	0.1	0.01	0.7699	-0.0182	0.0003	0.9577	0.0273	0.0007	0.9366	0	0	1	0.181	0.0328	0.5943	0.0228	0.0005	0.947	0.615	0.3783	0.044	0.4909	0.241	0.1252	0.4018	0.1615	0.2206	0.5364	0.2877	0.089	0.4909	0.241	0.1252	0.5103	0.2604	0.1088	0.3273	0.1071
Flavonoid glycoside 1	LC-MS	3	0.2909	0.0846	0.3855	0.123	0.0151	0.7186	0.1364	0.0186	0.6893	-0.2727	0.0744	0.4171	-0.3545	0.1257	0.2847	-0.1273	0.0162	0.7092	-0.1818	0.0331	0.5926	-0.0325	0.0011	0.9245	0.0592	0.0035	0.8627	0.7062	0.4987	0.0152	0.7455	0.5557	0.0085	0.4886	0.2387	0.1273	0.6455	0.4166	0.032	0.7273	0.5289	0.0112	0.6196	0.3839	0.042	0.2909	0.0846
2-methyl-furan-2,5-dicarboxylate	GC-MS	2	0.0091	0.0001	0.9788	-0.1139	0.013	0.7388	0.2091	0.0437	0.5372	-0.0818	0.0067	0.811	-0.1273	0.0162	0.7092	-0.0273	0.0007	0.9366	-0.0091	0.0001	0.9788	-0.2274	0.0517	0.5012	-0.0456	0.0021	0.8942	0.5558	0.3089	0.0758	0.7182	0.5158	0.0128	0.5982	0.3578	0.0519	0.8545	0.7302	0.0008	0.8	0.64	0.0031	0.6515	0.4244	0.0299	0.4545	0.2066
Shikimate	GC-MS	2	0.0818	0.0067	0.811	0.0957	0.0092	0.7796	0.0818	0.0067	0.811	-0.0364	0.0013	0.9155	-0.1	0.01	0.7699	-0.2909	0.0846	0.3855	-0.2545	0.0648	0.45	-0.3388	0.1148	0.3081	-0.4465	0.1993	0.1686	0.5513	0.3039	0.0788	0.7	0.49	0.0165	0.3059	0.0936	0.3602	0.4818	0.2321	0.1334	0.4636	0.215	0.1509	0.5285	0.2793	0.0947	-0.0182	0.0003
Quinic acid	GC-MS	2	-0.0818	0.0067	0.811	0.0547	0.003	0.8732	-0.1091	0.0119	0.7495	0.1182	0.014	0.7293	0.1091	0.0119	0.7495	-0.2273	0.0517	0.5015	-0.1727	0.0298	0.6115	-0.4084	0.1668	0.2123	-0.4966	0.2466	0.1202	0.3599	0.1295	0.2769	0.5182	0.2685	0.1025	0.0731	0.0053	0.831	0.2182	0.0476	0.5192	0.2455	0.0602	0.4669	0.3098	0.096	0.3539	-0.3182	0.1012
Unknown amine	GC-MS	2	-0.0455	0.0021	0.8944	-0.1822	0.0332	0.5918	-0.3909	0.1528	0.2345	-0.7364	0.5422	0.0098	-0.7182	0.5158	0.0128	-0.4182	0.1749	0.2006	-0.4909	0.241	0.1252	-0.0371	0.0014	0.9137	-0.2733	0.0747	0.416	0.8292	0.6875	0.0016	0.8273	0.6844	0.0017	0.5845	0.3416	0.059	0.5909	0.3492	0.0556	0.7091	0.5028	0.0146	0.6697	0.4485	0.0242	0.1727	0.0298
C5 sugar acid	GC-MS	2	0.0273	0.0007	0.9366	-0.1822	0.0332	0.5918	-0.1545	0.0239	0.65	-0.4727	0.2235	0.142	-0.5636	0.3177	0.071	-0.3	0.09	0.3701	-0.3455	0.1193	0.2981	-0.2506	0.0628	0.4573	-0.4237	0.1795	0.1941	0.8109	0.6576	0.0025	0.8818	0.7776	0.0003	0.6027	0.3633	0.0497	0.6636	0.4404	0.026	0.6909	0.4774	0.0186	0.7699	0.5928	0.0056	0.2455	0.0602
Erythronic / threonic acid	GC-MS	2	-0.3727	0.1389	0.2589	-0.3052	0.0932	0.3614	-0.5273	0.278	0.0956	-0.5727	0.328	0.0655	-0.5091	0.2592	0.1097	-0.4182	0.1749	0.2006	-0.4364	0.1904	0.1797	-0.4316	0.1863	0.185	-0.6515	0.4244	0.0299	0.5968	0.3562	0.0526	0.7909	0.6255	0.0037	0.2968	0.0881	0.3754	0.4182	0.1749	0.2006	0.5273	0.278	0.0956	0.4875	0.2376	0.1283	-0.1545	0.0239
Unknown glycoside 1	LC-MS	3	-0.3091	0.0955	0.355	-0.3098	0.096	0.3539	-0.1364	0.0186	0.6893	-0.3182	0.1012	0.3403	-0.3091	0.0955	0.355	-0.2273	0.0517	0.5015	-0.1818	0.0331	0.5926	-0.5755	0.3312	0.0639	-0.5421	0.2939	0.0849	0.4237	0.1795	0.1941	0.7364	0.5422	0.0098	0.411	0.1689	0.2093	0.5545	0.3075	0.0767	0.5545	0.3075	0.0767	0.5604	0.314	0.073	-0.0182	0.0003
Lignan	LC-MS	3	0.5636	0.3177	0.071	0.4282	0.1834	0.1888	0.7636	0.5831	0.0062	0.6727	0.4526	0.0233	0.5818	0.3385	0.0604	0.3455	0.1193	0.2981	0.4091	0.1674	0.2115	-0.1021	0.0104	0.7651	0.0729	0.0053	0.8313	-0.0228	0.0005	0.947	0.0182	0.0003	0.9577	-0.0959	0.0092	0.7791	0.1455	0.0212	0.6696	0.0273	0.0007	0.9366	0.0091	0.0001	0.9788	0.0182	0.0003
Flavonoid glycoside 4	LC-MS	3	0.5727	0.328	0.0655	0.3645	0.1328	0.2705	0.8727	0.7617	0.0005	0.4636	0.215	0.1509	0.4	0.16	0.2229	0.3	0.09	0.3701	0.3545	0.1257	0.2847	0.1021	0.0104	0.7651	0.1503	0.0226	0.659	0.0137	0.0002	0.9682	-0.0818	0.0067	0.811	0.0639	0.0041	0.8519	0.1636	0.0268	0.6307	-0.0182	0.0003	0.9577	0.0228	0.0005	0.947	0.1818	0.0331
Flavonoid glycoside 2	LC-MS	3	0.8182	0.6694	0.0021	0.7699	0.5928	0.0056	0.6455	0.4166	0.032	0.7091	0.5028	0.0146	0.6455	0.4166	0.032	0.1273	0.0162	0.7092	0.1727	0.0298	0.6115	0.2646	0.07	0.4318	0.246	0.0605	0.4659	0.0729	0.0053	0.8313	-0.0545	0.003	0.8734	-0.1963	0.0386	0.5628	0.0182	0.0003	0.9577	-0.0364	0.0013	0.9155	-0.082	0.0067	0.8106	-0.0636	0.004
Flavonoid glycoside 6	LC-MS	3	0.5182	0.2685	0.1025	0.7836	0.614	0.0043	0.2182	0.0476	0.5192	0.1455	0.0212	0.6696	0.1818	0.0331	0.5926	-0.4091	0.1674	0.2115	-0.4545	0.2066	0.1601	0.7983	0.6373	0.0032	0.3872	0.15	0.2393	0.3417	0.1167	0.3037	-0.0545	0.003	0.8734	-0.1553	0.0241	0.6485	0.0273	0.0007	0.9366	0.0273	0.0007	0.9366	-0.1731	0.03	0.6107	0.2273	0.0517
Tryptophan	LC-MS	1	0.5727	0.328	0.0655	0.697	0.4859	0.0171	0.7091	0.5028	0.0146	0.4091	0.1674	0.2115	0.3818	0.1458	0.2466	-0.1182	0.014	0.7293	-0.1091	0.0119	0.7495	0.7844	0.6153	0.0043	0.492	0.2421	0.1242	0	0	1	-0.4273	0.1826	0.1899	-0.1142	0.013	0.7382	-0.0727	0.0053	0.8317	-0.2636	0.0695	0.4334	-0.2825	0.0798	0.4	0.4	0.16
Unknown glycoside 2	LC-MS	3	0.5182	0.2685	0.1025	0.7107	0.5051	0.0142	0.4091	0.1674	0.2115	0.5909	0.3492	0.0556	0.6364	0.405	0.0353	0.1182	0.014	0.7293	0.1455	0.0212	0.6696	0.2042	0.0417	0.547	0.2323	0.054	0.4918	-0.2232	0.0498	0.5094	-0.2636	0.0695	0.4334	-0.5845	0.3416	0.059	-0.2727	0.0744	0.4171	-0.2364	0.0559	0.4841	-0.4692	0.2202	0.1454	-0.2818	0.0794
Chlorogenic acid 1	LC-MS	1	0.2273	0.0517	0.5015	0.6241	0.3896	0.0401	0.1818	0.0331	0.5926	0.7727	0.5971	0.0053	0.8273	0.6844	0.0017	0.0636	0.004	0.8525	0.1364	0.0186	0.6893	0.1068	0.0114	0.7547	0.3007	0.0904	0.3689	-0.4055	0.1644	0.216	-0.3455	0.1193	0.2981	-0.6256	0.3913	0.0395	-0.3364	0.1131	0.3118	-0.2818	0.0794	0.4011	-0.5103	0.2604	0.1088	-0.3818	0.1458
Hexadecanoyl-glycerol	LC-MS	2	0.4909	0.241	0.1252	0.6469	0.4185	0.0314	0.1909	0.0364	0.5739	0.6455	0.4166	0.032	0.7091	0.5028	0.0146	0.1364	0.0186	0.6893	0.1727	0.0298	0.6115	0.1671	0.0279	0.6234	0.0547	0.003	0.8732	-0.328	0.1076	0.3247	-0.4273	0.1826	0.1899	-0.7215	0.5205	0.0122	-0.5818	0.3385	0.0604	-0.5182	0.2685	0.1025	-0.5877	0.3454	0.0573	-0.6091	0.371
Alanine	GC-MS	2	0.3818	0.1458	0.2466	0.3007	0.0904	0.3689	0.1818	0.0331	0.5926	0.4273	0.1826	0.1899	0.4273	0.1826	0.1899	0.3182	0.1012	0.3403	0.2727	0.0744	0.4171	0.3527	0.1244	0.2873	0.1868	0.0349	0.5824	-0.3007	0.0904	0.3689	-0.5364	0.2877	0.089	-0.5069	0.2569	0.1116	-0.4	0.16	0.2229	-0.4364	0.1904	0.1797	-0.533	0.2841	0.0913	0.0091	0.0001
Serine	GC-MS	2	0.1909	0.0364	0.5739	0.0137	0.0002	0.9682	0.0636	0.004	0.8525	0.2	0.04	0.5554	0.1818	0.0331	0.5926	0.3455	0.1193	0.2981	0.2818	0.0794	0.4011	0.3852	0.1484	0.242	0.3052	0.0932	0.3614	-0.2369	0.0561	0.4831	-0.5182	0.2685	0.1025	-0.2146	0.0461	0.5263	-0.3182	0.1012	0.3403	-0.3545	0.1257	0.2847	-0.3554	0.1263	0.2835	0.1545	0.0239
beta-alanine	GC-MS	2	0.1545	0.0239	0.65	-0.0273	0.0007	0.9364	-0.0182	0.0003	0.9577	0.1909	0.0364	0.5739	0.1818	0.0331	0.5926	0.5727	0.328	0.0655	0.5182	0.2685	0.1025	0.0835	0.007	0.8071	0.5011	0.2511	0.1163	-0.6059	0.3671	0.0482	-0.5727	0.328	0.0655	-0.4155	0.1727	0.2037	-0.4818	0.2321	0.1334	-0.3545	0.1257	0.2847	-0.4784	0.2288	0.1367	-0.1364	0.0186
Disaccharide	GC-MS	2	0.2455	0.0602	0.4669	0.2187	0.0478	0.5183	0.2091	0.0437	0.5372	-0.0545	0.003	0.8734	0.0091	0.0001	0.9788	0.0909	0.0083	0.7904	0.0364	0.0013	0.9155	0.5662	0.3206	0.0694	0.369	0.1362	0.2641	-0.2961	0.0877	0.3766	-0.5818	0.3385	0.0604	-0.2922	0.0854	0.3832	-0.3545	0.1257	0.2847	-0.4	0.16	0.2229	-0.4966	0.2466	0.1202	0.1818	0.0331
Unknown glycoside 4	LC-MS	3	-0.1182	0.014	0.7293	0.1321	0.0175	0.6986	-0.1182	0.014	0.7293	0.0909	0.0083	0.7904	0.2273	0.0517	0.5015	-0.0545	0.003	0.8734	0.0091	0.0001	0.9788	0.2089	0.0436	0.5377	0.2642	0.0698	0.4324	-0.574	0.3295	0.0648	-0.6182	0.3821	0.0426	-0.3607	0.1301	0.2758	-0.6273	0.3935	0.0388	-0.5727	0.328	0.0655	-0.5103	0.2604	0.1088	-0.4909	0.241
Unknown glycoside 3	LC-MS	3	-0.2	0.04	0.5554	0	0	1	0.0364	0.0013	0.9155	0.2455	0.0602	0.4669	0.2636	0.0695	0.4334	0.3182	0.1012	0.3403	0.3273	0.1071	0.3259	0.13	0.0169	0.7033	0.7335	0.538	0.0102	-0.5923	0.3508	0.0549	-0.5364	0.2877	0.089	-0.242	0.0586	0.4734	-0.3636	0.1322	0.2716	-0.2636	0.0695	0.4334	-0.3918	0.1535	0.2334	-0.0909	0.0083
Docosenamide	LC-MS	2	-0.3	0.09	0.3701	-0.0638	0.0041	0.8522	-0.0727	0.0053	0.8317	0.2818	0.0794	0.4011	0.2545	0.0648	0.45	0.1818	0.0331	0.5926	0.2091	0.0437	0.5372	0.0371	0.0014	0.9137	0.4784	0.2288	0.1367	-0.6014	0.3616	0.0503	-0.5455	0.2975	0.0827	-0.2557	0.0654	0.4479	-0.4455	0.1984	0.1697	-0.4	0.16	0.2229	-0.3599	0.1295	0.2769	-0.1364	0.0186
Choline and glutamate	LC-MS	1	-0.0909	0.0083	0.7904	-0.1367	0.0187	0.6886	-0.0091	0.0001	0.9788	0.4091	0.1674	0.2115	0.4364	0.1904	0.1797	0.6182	0.3821	0.0426	0.6091	0.371	0.0467	-0.1671	0.0279	0.6234	0.0683	0.0047	0.8418	-0.8337	0.6951	0.0014	-0.7636	0.5831	0.0062	-0.726	0.5271	0.0114	-0.7273	0.5289	0.0112	-0.7	0.49	0.0165	-0.7472	0.5582	0.0082	-0.3636	0.1322
4-hydroxybenzoic acid	GC-MS	2	-0.1909	0.0364	0.5739	-0.1276	0.0163	0.7086	-0.3545	0.1257	0.2847	-0.1455	0.0212	0.6696	-0.0636	0.004	0.8525	0.1909	0.0364	0.5739	0.1455	0.0212	0.6696	0.0835	0.007	0.8071	0.205	0.042	0.5454	-0.6651	0.4424	0.0255	-0.6545	0.4284	0.0289	-0.5434	0.2953	0.0841	-0.7455	0.5557	0.0085	-0.6	0.36	0.051	-0.6287	0.3953	0.0383	-0.3818	0.1458
Erythronic acid gamma lactone	GC-MS	2	-0.2182	0.0476	0.5192	-0.1822	0.0332	0.5918	-0.5182	0.2685	0.1025	-0.2	0.04	0.5554	-0.1091	0.0119	0.7495	0.0727	0.0053	0.8317	0.0636	0.004	0.8525	-0.1578	0.0249	0.6431	-0.1503	0.0226	0.659	-0.7016	0.4922	0.0161	-0.5636	0.3177	0.071	-0.589	0.347	0.0565	-0.8273	0.6844	0.0017	-0.6727	0.4526	0.0233	-0.5786	0.3348	0.0622	-0.6455	0.4166
4-hydroxybenzaldehyde	GC-MS	2	-0.3091	0.0955	0.355	-0.123	0.0151	0.7186	-0.4182	0.1749	0.2006	-0.1273	0.0162	0.7092	-0.0727	0.0053	0.8317	-0.0455	0.0021	0.8944	-0.0364	0.0013	0.9155	-0.1532	0.0235	0.653	-0.1048	0.011	0.7591	-0.6424	0.4126	0.0331	-0.5091	0.2592	0.1097	-0.5251	0.2758	0.0972	-0.7545	0.5693	0.0073	-0.6364	0.405	0.0353	-0.5103	0.2604	0.1088	-0.5636	0.3177
Urea	GC-MS	2	-0.2545	0.0648	0.45	-0.2141	0.0458	0.5272	-0.7636	0.5831	0.0062	-0.4727	0.2235	0.142	-0.3727	0.1389	0.2589	-0.2	0.04	0.5554	-0.2727	0.0744	0.4171	0.0511	0.0026	0.8815	-0.2005	0.0402	0.5545	-0.0911	0.0083	0.7899	-0.1182	0.014	0.7293	-0.2466	0.0608	0.4648	-0.4	0.16	0.2229	-0.2182	0.0476	0.5192	-0.2232	0.0498	0.5094	-0.3364	0.1131
Lactic acid	GC-MS	2	-0.1	0.01	0.7699	-0.1093	0.012	0.749	-0.7364	0.5422	0.0098	-0.6	0.36	0.051	-0.5364	0.2877	0.089	-0.4	0.16	0.2229	-0.4727	0.2235	0.142	0.1671	0.0279	0.6234	-0.164	0.0269	0.6299	0.123	0.0151	0.7186	0.0636	0.004	0.8525	-0.0183	0.0003	0.9575	-0.2182	0.0476	0.5192	-0.0455	0.0021	0.8944	0.0091	0.0001	0.9788	-0.2	0.04
Chlorogenic acid 2	LC-MS	1	-0.6909	0.4774	0.0186	-0.4191	0.1757	0.1994	-0.4909	0.241	0.1252	-0.2636	0.0695	0.4334	-0.2455	0.0602	0.4669	-0.2727	0.0744	0.4171	-0.2545	0.0648	0.45	-0.297	0.0882	0.375	-0.2961	0.0877	0.3766	-0.2506	0.0628	0.4574	-0.0182	0.0003	0.9577	-0.0594	0.0035	0.8624	-0.0455	0.0021	0.8944	-0.0636	0.004	0.8525	-0.0547	0.003	0.8732	0.0636	0.004
Chlorogenic acid 3	LC-MS	1	-0.6091	0.371	0.0467	-0.5467	0.2989	0.0818	-0.5091	0.2592	0.1097	-0.2545	0.0648	0.45	-0.2818	0.0794	0.4011	-0.0818	0.0067	0.811	-0.0909	0.0083	0.7904	-0.2692	0.0725	0.4234	-0.2961	0.0877	0.3766	-0.3417	0.1167	0.3037	-0.1818	0.0331	0.5926	-0.0639	0.0041	0.8519	-0.1818	0.0331	0.5926	-0.2182	0.0476	0.5192	-0.0957	0.0092	0.7796	0.0909	0.0083
aGC-MS = gas chromatography coupled to mass spectrometry
aLC-MS = liquid chromatography coupled to mass spectrometry
bSumner score (Sumner et al, Metabolomics 2007)
[truncated: 40 more columns]
